# Supplementary material for: Spontaneous off-stoichiometry as the knob to control the dielectric properties of gapped metals
Source: Royal Society of Chemistry journal article supplement (doi:10.1039/d3cp01100c), 2023-01-01
Supplement: d3cp01100c1.pdf [file d3cp01100c1.pdf]

## Supplementary materials

for

### **Spontaneous off-stoichiometry as the knob to control dielectric properties of gapped metals**

Muhammad Rizwan Khan<sup>1</sup>, Harshan Reddy Gopidi<sup>1</sup>, Hamid Reza Darabian<sup>1</sup>, Dorota A. Pawlak<sup>1</sup>, and  
Oleksandr I. Malyi<sup>1,#</sup>

<sup>1</sup>Centre of Excellence ENSEMBLE<sup>3</sup> Sp. z o. o., Wolczynska Str. 133, 01-919, Warsaw, Poland

#Email: [oleksandrmalyi@gmail.com](mailto:oleksandrmalyi@gmail.com)

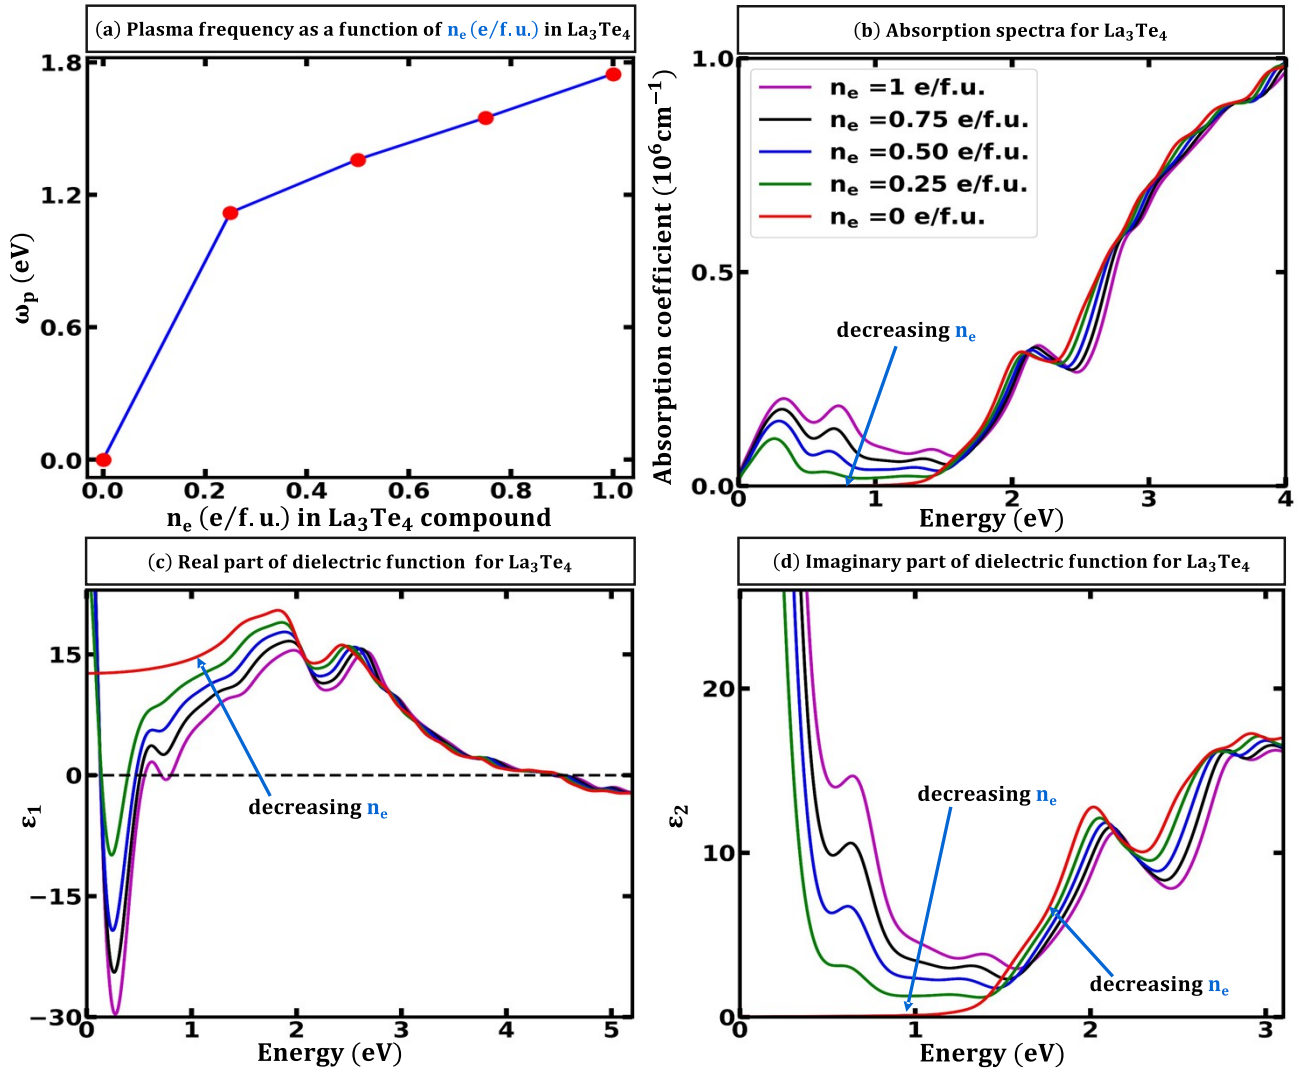

**Figure S1:** (a) Plasma frequency as a function of different numbers of electrons in  $\text{La}_3\text{Te}_4$ . (b) Absorption spectra for  $\text{La}_3\text{Te}_4$  with different number of electrons considering superposition of both interband and intraband transitions. (c) Real and (d) imaginary part of dielectric function for a different number of electrons per formula unit ( $n_e/\text{f.u.}$ ) in the conduction band of  $\text{La}_3\text{Te}_4$ . The results are shown for a ridged shift of the Fermi level.
